# Supplementary material for: CircCDKN2B-AS1 interacts with IMP3 to stabilize hexokinase 2 mRNA and facilitate cervical squamous cell carcinoma aerobic glycolysis progression
Source: J Exp Clin Cancer Res. 2020 Dec 11;39:281. doi: 10.1186/s13046-020-01793-7 (PMC7731507; doi:10.1186/s13046-020-01793-7)
Supplement: Supplementary file 1 — Additional file 1: Table S1. Patient information for all specimens. [file 13046_2020_1793_MOESM1_ESM.xlsx]

## Sheet: tissue samples' information
qRT-PCR
case number	sample number	HPV type	group	RNA integrity （RIN）
case1	cc11	-	NCE	7.5
case2	cc12	-	NCE	6.9
case3	cc19	-	NCE	7.5
case4	cc20	-	NCE	7.2
case5	cc21	-	NCE	7.9
case6	cc23	-	NCE	7.7
case7	cc25	-	NCE	7
case8	cc26	-	NCE	6.7
case9	c2	-	NCE	9.3
case10	a5	-	NCE	7.5
case11	a10	-	NCE	7.5
case12	cc14	-	NCE	7.2
case13	yn6	-	NCE	7.3
case14	yn10	-	NCE	8.3
case15	yn12	-	NCE	8.3
case16	yn14	-	NCE	7.3
case17	yn19	-	NCE	8.2
case18	yn24	-	NCE	7.4
case19	yn25	-	NCE	7
case20	yn26	-	NCE	7.9
case21	yn30	-	NCE	8.6
case22	yn32	-	NCE	7.7
case23	yn33	-	NCE	7.1
case24	yn34	-	NCE	7.4
case25	yn29	-	NCE	7.1
case26	B3	16+、56+	NCE
case27	B11	18,45+	NCE
case28	B12	58+	NCE
case29	B18	16,58+	NCE
case30	B52	16,18,52+	NCE
case31	B55	58(+)	NCE
case32	B1	16(+)	NCE
case33	A66	-	NCE
case34	A67	-	NCE
case35	B71	31+	NCE
case36	A76	-	NCE
case37	A50	-	NCE
case38	A63	-	NCE
case39	A64	-	NCE
case40	A68	-	NCE
case41	A70	-	NCE
case42	B74	16+	NCE
case43	A79	-	NCE
case44	B81	16+、33+	NCE
case45	A93	-	NCE
case46	A94	-	NCE
case47	ch22	16+	HSIL	7.5
case48	ch24	16+	HSIL	8
case49	ch26	16+	HSIL	7.8
case50	ch5	16+	HSIL	7.3
case51	16yh14	16+	HSIL	8.3
case52	16yh15	16+	HSIL	7.4
case53	16yh17	16+	HSIL	7.7
case54	16yh18	16+	HSIL	7.9
case55	16yh22	16+	HSIL	7.7
case56	16yh23	16+	HSIL	7.7
case57	16yh24	16+	HSIL	7.8
case58	16yh25	16+	HSIL	8
case59	16yh26	16+	HSIL	7.4
case60	16yh27	16+	HSIL	7.3
case61	16yh3	16+	HSIL	7.2
case62	16yh7	16+	HSIL	7.2
case63	16yh9	16+	HSIL	7.6
case64	yh13	16+	HSIL	6.9
case65	yh21	16+	HSIL	7.1
case66	yh30	16+	HSIL	8
case67	cs18	16+	SCC	8.8
case68	cs19	16+	SCC	7.9
case69	cs20	16+	SCC	7.5
case70	cs22	16+	SCC	7.5
case71	cs23	16+	SCC	7.9
case72	cs25	16+	SCC	8.6
case73	cs30	16+	SCC	9.7
case74	cs32	16+	SCC	9.2
case75	cs33	16+	SCC	6.4
case76	cs13	16+	SCC	8.2
case77	16ys3	16+	SCC	6.9
case78	16ys7	16+	SCC	7.1
case79	16ys8	16+	SCC	8.9
case80	ys19	16+	SCC	6.9
case81	ys20	16+	SCC	8.6
case82	ys25	16+	SCC	7.9
case83	ys27	16+	SCC	8.8
case84	ys12	16+	SCC	8.5
case85	ys17	16+	SCC	9.2
case86	ys2	16+	SCC	7.3
case87	ys23	16+	SCC	9.5
case88	ch3	39+、45+、51+	HSIL	7
case89	ch6	18+、35+、cp+	HSIL	7.8
case90	ch19	33+.52+	HSIL	7.5
case91	ch20	58+	HSIL	7.6
case92	ch21	33+	HSIL	6.8
case93	ch28	58+	HSIL	7.1
case94	ch31	52+	HSIL	7.9
case95	ch32	16+、52+	HSIL	7.5
case96	ch33	58+	HSIL	7.5
case97	yh18	58+	HSIL	7.3
case98	yh19	58+	HSIL	7.8
case99	yh32	52+	HSIL	7.6
case100	yh6	52+	HSIL	7.4
case101	yh25	39+	HSIL	7.4
case102	cs4	18+	SCC	7.6
case103	cs5	18+	SCC	7.4
case104	cs6	56+	SCC	6.9
case105	cs7	58+	SCC	7.1
case106	cs21	58+	SCC	8.9
case107	cs26	31+	SCC	6.8
case108	cs27	33+ 45+	SCC	7.6
case109	cs31	18+	SCC	8.8
case110	ys11	44+.53+	SCC	8.4
case111	ys15	31+	SCC	7.4
case112	ys21	31+	SCC	7.6
case113	ys3	35+	SCC	7
case114	ys6	31+、58+	SCC	7.4
case115	ys8	31+	SCC	7.7
case116	ys9	58+	SCC	70
case117	Bs1	45+	SCC
case118	Bs2	18+	SCC
case119	Bs3	18+	SCC
case120	Bs4	39+	SCC
case121	Bs5	33+	SCC
case122	Bs6	45+	SCC
case123	Bs7	16+.56+.58+	SCC
case124	Bs8	58+	SCC
case125	Bs9	59+	SCC
case126	Bs10	58+	SCC
case127	Bs11	16+	SCC
case128	Bs12	16+、59+、52+、56+	SCC
case129	Bs13	18+、53+	SCC
case130	Bs14	16+、44+、53+	SCC
case131	Bs15	53+	SCC
case132	Bs16	16+、51+、cp+	SCC
case133	Bs17	16+	SCC
case134	Bs18	52+	SCC
case135	Bs19	16+、31+	SCC
case136	Bs20	16+、39+	SCC
case137	Bs21	-	SCC
case138	Bs22	56+	SCC
case139	Bs23	52+	SCC
case140	Bs24	58+、52+	SCC
case141	Bs25	31+、53+	SCC
case142	Bs26	6+	SCC
case143	Bs27	-	SCC
case144	Bs28	56+	SCC
case145	Bs29	58+	SCC
case146	Bs30	18+	SCC
case147	Bs31	16+、66+	SCC
case148	Bs32	56+	SCC
case149	Bs33	66+	SCC
case150	Bs34	52+	SCC
case151	Bs35	68+	SCC
case152	Bs36	68+	SCC
case153	Bs37	53+	SCC
case154	Bs38	16+、18+	SCC
case155	Bs39	18+	SCC
case156	Bh1	58+	HSIL
case157	Bh2	18+、58、+53、cp+	HSIL
case158	Bh3	51+、56+、66+	HSIL
case159	Bh4	16+	HSIL
case160	Bh5	58+	HSIL
case161	Bh6	58+、33+	HSIL
case162	Bh7	31+	HSIL
