# Supplementary material for: CircCDKN2B-AS1 interacts with IMP3 to stabilize hexokinase 2 mRNA and facilitate cervical squamous cell carcinoma aerobic glycolysis progression
Source: J Exp Clin Cancer Res. 2020 Dec 11;39:281. doi: 10.1186/s13046-020-01793-7 (PMC7731507; doi:10.1186/s13046-020-01793-7)
Supplement: Supplementary file 9 — Additional file 9: Table S5. All proteins predicted by RBPmap. [file 13046_2020_1793_MOESM9_ESM.xlsx]

## Sheet: circRNA12542_Predictions
Predictions for sequence: circRNA12542
Calculation parameters:
Genome: Human (hg19)
Selected motifs: All Human/Mouse motifs
Stringency level: High
Conservation filter: On
======================================================================================================================
Protein: CNOT4(Hs/Mm)
Sequence Position	Motif	K-mer	Z-score	P-value
142	gacaga	gaaaga	2.359	0.00916
Protein: CUG-BP(Hs/Mm)
Sequence Position	Motif	K-mer	Z-score	P-value
31	ugcug	uucug	1.655	0.049
64	ugcug	uucug	1.655	0.049
71	ugcug	uucug	1.655	0.049
174	ugcug	ugcug	2.664	0.00386
198	ugcug	uacug	2.407	0.00804
201	ugcug	ugcuu	1.655	0.049
Protein: ESRP2(Hs/Mm)
Sequence Position	Motif	K-mer	Z-score	P-value
308	ugggrad	ugggaau	2.684	0.00364
Protein: HNRNPA2B1(Hs/Mm)
Sequence Position	Motif	K-mer	Z-score	P-value
292	gguaguag	ggaagugg	3.046	0.00116
Protein: HNRNPC(Hs/Mm)
Sequence Position	Motif	K-mer	Z-score	P-value
133	huuuuuk	auuuucu	2.259	0.0119
Protein: HNRNPCL1(Hs/Mm)
Sequence Position	Motif	K-mer	Z-score	P-value
133	huuuuuk	auuuucu	2.254	0.0121
Protein: HNRNPH1(Hs/Mm)
Sequence Position	Motif	K-mer	Z-score	P-value
315	gargag	gaggag	2.62	0.0044
Protein: HNRNPL(Hs/Mm)
Sequence Position	Motif	K-mer	Z-score	P-value
114	amayama	aaacaca	3.867	5.51e-05
116	amayama	acacaca	4.093	2.13e-05
Protein: HNRPLL(Hs/Mm)
Sequence Position	Motif	K-mer	Z-score	P-value
114	rcahaca	aaacaca	3.152	0.000811
116	rcahaca	acacaca	3.582	0.00017
Protein: IGF2BP2(Hs/Mm)
Sequence Position	Motif	K-mer	Z-score	P-value
112	vmahwca	aaaaaca	3.11	0.000935
114	vmahwca	aaacaca	2.932	0.00168
116	vmahwca	acacaca	3.027	0.00123
Protein: IGF2BP3(Hs/Mm)
Sequence Position	Motif	K-mer	Z-score	P-value
112	amahwca	aaaaaca	3.119	0.000907
114	amahwca	aaacaca	3.045	0.00116
116	amahwca	acacaca	3.119	0.000907
Protein: KHDRBS1(Hs/Mm)
Sequence Position	Motif	K-mer	Z-score	P-value
122	auaaaav	aucaaag	2.619	0.00441
328	auaaaav	auuaaac	1.845	0.0325
Protein: KHDRBS2(Hs/Mm)
Sequence Position	Motif	K-mer	Z-score	P-value
49	rauaaam	gaucaaa	2.153	0.0157
Protein: LIN28A(Hs/Mm)
Sequence Position	Motif	K-mer	Z-score	P-value
127	hggagwa	aggagaa	1.838	0.033
275	hggagwa	uggagaa	1.73	0.0418
Protein: MBNL1(Hs/Mm)
Sequence Position	Motif	K-mer	Z-score	P-value
64	ygcuky	uucugu	1.99	0.0233
67	ygcuky	uguuuu	1.99	0.0233
162	ygcuky	cacugu	2.245	0.0124
174	ygcuky	ugcugg	2.392	0.00838
182	ygcuky	uccuuu	2.843	0.00223
198	ygcuky	uacugc	2.706	0.00341
201	ygcuky	ugcuuu	2.912	0.0018
Protein: PABPC1(Hs/Mm)
Sequence Position	Motif	K-mer	Z-score	P-value
55	araaaam	agaaaag	2.51	0.00604
110	araaaam	ugaaaaa	2.225	0.013
212	araaaam	agaaaac	2.353	0.00931
Protein: PABPC3(Hs/Mm)
Sequence Position	Motif	K-mer	Z-score	P-value
111	raaaacm	gaaaaac	2.761	0.00288
112	raaaacm	aaaaaca	2.83	0.00233
213	raaaacm	gaaaacc	1.966	0.0246
Protein: PABPC4(Hs/Mm)
Sequence Position	Motif	K-mer	Z-score	P-value
112	aaaaaar	aaaaaca	2.918	0.00176
Protein: PABPN1(Hs/Mm)
Sequence Position	Motif	K-mer	Z-score	P-value
55	araaga	agaaaa	2.944	0.00162
57	araaga	aaaaga	2.981	0.00144
209	araaga	agaaga	2.083	0.0186
212	araaga	agaaaa	1.889	0.0294
Protein: PCBP1(Hs/Mm)
Sequence Position	Motif	K-mer	Z-score	P-value
183	ccwwhcc	ccuuucc	1.922	0.0273
Protein: PCBP3(Hs/Mm)
Sequence Position	Motif	K-mer	Z-score	P-value
184	uuuycc	cuuucc	3.014	0.00129
Protein: PTBP1(Hs/Mm)
Sequence Position	Motif	K-mer	Z-score	P-value
137	ucuu	ucuu	2.161	0.0153
184	cucucu	cuuucc	1.839	0.033
203	cucucu	cuuucu	2.205	0.0137
226	cucucu	aucuau	1.884	0.0298
228	cucucu	cuauuu	1.884	0.0298
Protein: QKI(Hs/Mm)
Sequence Position	Motif	K-mer	Z-score	P-value
242	acuaay	ucuaac	1.946	0.0258
Protein: RALY(Hs/Mm)
Sequence Position	Motif	K-mer	Z-score	P-value
69	uuuuuub	uuuucug	2.339	0.00967
135	uuuuuub	uuucuug	2.348	0.00944
Protein: RBM28(Hs/Mm)
Sequence Position	Motif	K-mer	Z-score	P-value
285	gwguagd	caguaga	1.653	0.0492
Protein: RBM46(Hs/Mm)
Sequence Position	Motif	K-mer	Z-score	P-value
49	rausawd	gaucaaa	2.211	0.0135
Protein: RBM5(Hs/Mm)
Sequence Position	Motif	K-mer	Z-score	P-value
299	garggwr	gcaggaa	2.154	0.0156
Protein: RBMS3(Hs/Mm)
Sequence Position	Motif	K-mer	Z-score	P-value
83	hauaua	gauaua	2.635	0.00421
85	hauaua	uauaug	2.521	0.00585
Protein: SART3(Hs/Mm)
Sequence Position	Motif	K-mer	Z-score	P-value
55	araaaam	agaaaag	2.51	0.00604
110	araaaam	ugaaaaa	2.225	0.013
212	araaaam	agaaaac	2.353	0.00931
Protein: SNRNP70(Hs/Mm)
Sequence Position	Motif	K-mer	Z-score	P-value
49	rwucaag	gaucaaa	1.822	0.0342
Protein: SRSF1(Hs/Mm)
Sequence Position	Motif	K-mer	Z-score	P-value
275	ugrwgvh	uggagaa	2.133	0.0165
Protein: SRSF10(Hs/Mm)
Sequence Position	Motif	K-mer	Z-score	P-value
53	agagavm	aaagaaa	2.434	0.00747
145	agagavm	agagagg	2.289	0.011
251	agagavm	aaagaaa	2.735	0.00312
Protein: SRSF2(Hs/Mm)
Sequence Position	Motif	K-mer	Z-score	P-value
64	ugcygyy	uucuguu	2.172	0.0149
127	ggagwd	aggaga	1.908	0.0282
198	ugcygyy	uacugcu	2.313	0.0104
201	ugcygyy	ugcuuuc	1.859	0.0315
275	ggagwd	uggaga	2.333	0.00982
Protein: SRSF3(Hs/Mm)
Sequence Position	Motif	K-mer	Z-score	P-value
38	wcwwc	ucaac	3.294	0.000494
61	cuckucy	gacuucu	1.82	0.0344
62	wcwwc	acuuc	3.294	0.000494
66	cuckucy	cuguuuu	1.85	0.0322
68	cuckucy	guuuucu	1.85	0.0322
120	wcwwc	acauc	2.676	0.00373
183	cuckucy	ccuuucc	1.69	0.0455
184	cuckucy	cuuuccc	1.69	0.0455
281	wcwwc	acuuc	1.941	0.0261
Protein: SRSF5(Hs/Mm)
Sequence Position	Motif	K-mer	Z-score	P-value
63	yywcwsg	cuucugu	2.473	0.0067
70	yywcwsg	uuucugg	2.978	0.00145
123	yywcwsg	ucaaagg	2.204	0.0138
135	yywcwsg	uuucuug	2.204	0.0138
161	yywcwsg	ucacugu	2.301	0.0107
185	yywcwsg	uuucccg	2.484	0.0065
204	yywcwsg	uuucuag	2.269	0.0116
261	yywcwsg	ucagagg	2.484	0.0065
268	yywcwsg	uaacagg	2.484	0.0065
282	yywcwsg	cuucagu	2.462	0.00691
Protein: SRSF7(Hs/Mm)
Sequence Position	Motif	K-mer	Z-score	P-value
127	wggacra	aggagaa	2.436	0.00743
275	wggacra	uggagaa	2.436	0.00743
348	acgagagay	augagaguu	1.85	0.0322
Protein: SRSF9(Hs/Mm)
Sequence Position	Motif	K-mer	Z-score	P-value
316	akgavmr	aggagca	2	0.0227
Protein: TARDBP(Hs/Mm)
Sequence Position	Motif	K-mer	Z-score	P-value
70	ugugug	uuucug	2	0.0227
85	ugugug	uauaug	2.009	0.0223
87	ugugug	uauguu	2.009	0.0223
92	ugugug	uaucug	2	0.0227
94	ugugug	ucugug	2.358	0.00919
96	ugugug	ugugcu	1.945	0.0259
165	ugugug	uguuag	1.917	0.0276
168	ugugug	uaggug	1.917	0.0276
170	ugugug	ggugug	2.303	0.0106
172	ugugug	ugugcu	1.917	0.0276
Protein: TRA2A(Hs/Mm)
Sequence Position	Motif	K-mer	Z-score	P-value
287	gaagaggaag	guagaggaag	2.554	0.00532
293	gaagaggaag	gaaguggcag	2.283	0.0112
Protein: TRA2B(Hs/Mm)
Sequence Position	Motif	K-mer	Z-score	P-value
86	aaguguu	auauguu	2.263	0.0118
88	aaguguu	auguuau	1.705	0.0441
103	gaagaa	aaagaa	2.089	0.0184
104	aaguguu	aagaauu	2.242	0.0125
107	aaguguu	aauugaa	1.716	0.0431
111	gaagaa	gaaaaa	2.089	0.0184
128	gaagaa	ggagaa	2.089	0.0184
129	aaguguu	gagaauu	1.684	0.0461
144	aaguguu	aagagag	1.8	0.0359
148	aaguguu	gaggguu	2.463	0.00689
156	aaguguu	aagcauc	1.811	0.0351
162	aaguguu	cacuguu	2.432	0.00751
169	aaguguu	aggugug	2.432	0.00751
171	aaguguu	gugugcu	1.768	0.0385
180	aaguguu	aauccuu	1.684	0.0461
276	gaagaa	ggagaa	2.089	0.0184
350	aaguguu	gagaguu	1.726	0.0422
Protein: U2AF2(Hs/Mm)
Sequence Position	Motif	K-mer	Z-score	P-value
67	uuuuuyc	uguuuuc	1.905	0.0284
Protein: YBX1(Hs/Mm)
Sequence Position	Motif	K-mer	Z-score	P-value
40	aacaucd	aacagca	2.61	0.00453
257	aacaucd	accauca	3.26	0.000557
280	aacaucd	aacuuca	2.039	0.0207
Protein: ZCRB1(Hs/Mm)
Sequence Position	Motif	K-mer	Z-score	P-value
106	grhuuaa	gaauuga	2.268	0.0117
